# Supplementary material
Source: HighWire-hosted journal article supplement (https://www.life-science-alliance.org/content/6/3/e202201722/F5)

Figure S2A

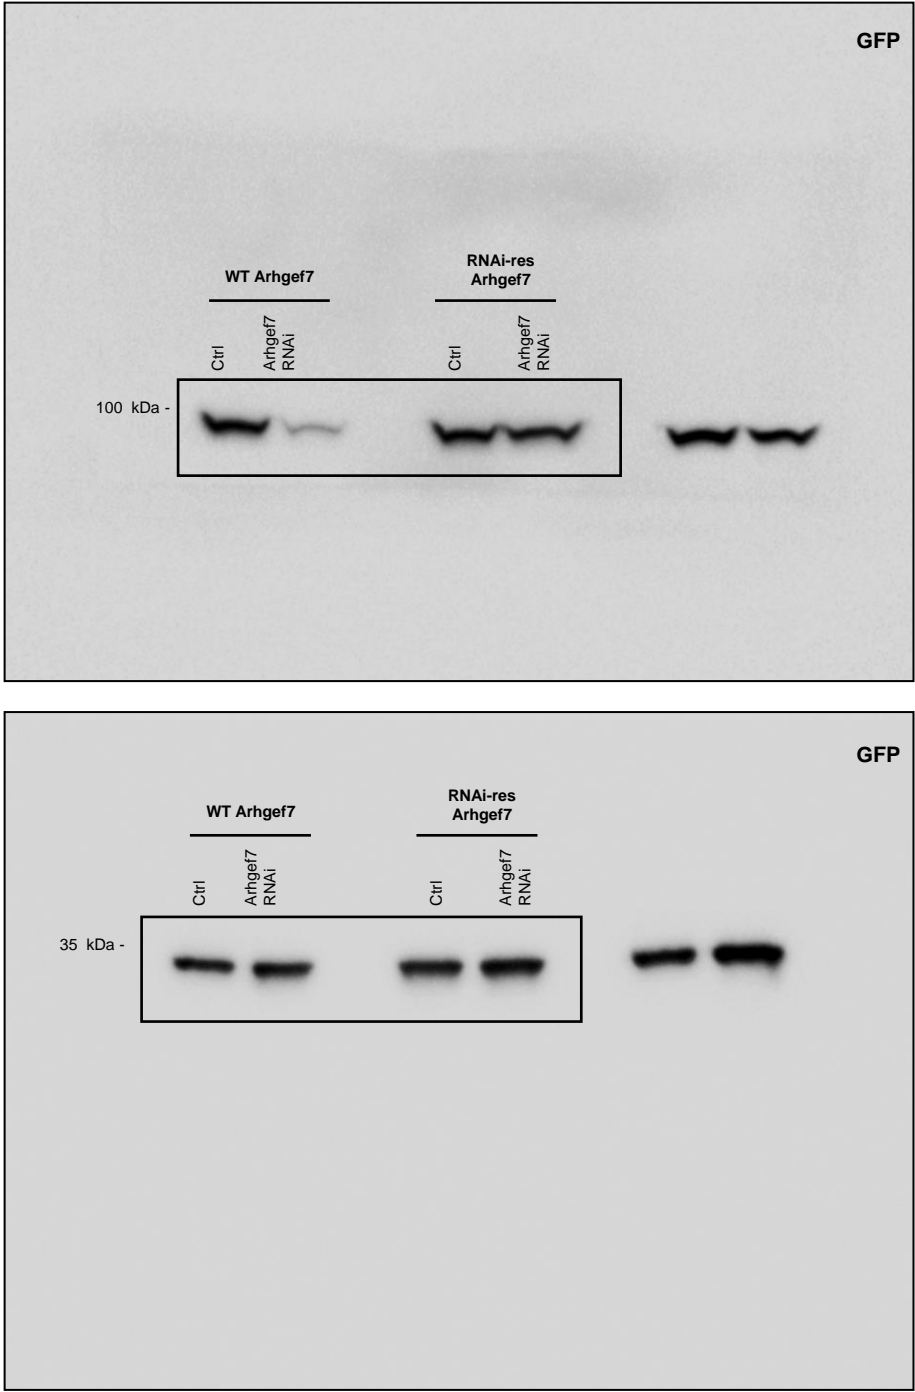

Supplement: inline-supplementary-material-8 [file inline-supplementary-material-8.pdf]
